# Supplementary material for: Geometrical optimisation of core–shell nanowire arrays for enhanced absorption in thin crystalline silicon heterojunction solar cells
Source: publisher site journal article supplement (doi:10.3762/bjnano.10.31), 2019-01-31
Supplement: Additional file 1 [file 2190-4286-10-31-S1.pdf]

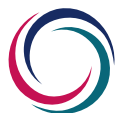

## Supporting Information

for

### **Geometrical optimisation of core–shell nanowire arrays for enhanced absorption in thin crystalline silicon heterojunction solar cells**

Robin Vismara, Olindo Isabella, Andrea Ingenito, Fai Tong Si and Miro Zeman

*Beilstein J. Nanotechnol.* **2019**, *10*, 322–331. [doi:10.3762/bjnano.10.31](https://doi.org/10.3762/bjnano.10.31)

## Additional experimental data

## Reflectance of manufactured devices

In Figure S1, the measured reflection spectra of the FLAT and NW devices are presented. The reflectance of the NW cell is significantly lower than for the FLAT reference, particularly at short and long wavelengths.

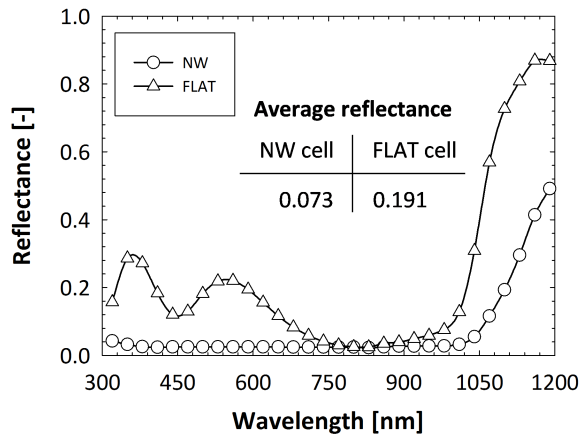

**Figure S1:** Measured reflectance spectra of the NW and FLAT solar cells.

## Calculated losses as function of nanowire height and cross-section

In Figure S2, the losses in implied photocurrent density due to reflection and parasitic absorption are presented.

In the case of reflection, better performance (i.e. smaller losses) is displayed by taller nanowires (larger  $h$ ) and for cross-section ( $\Lambda$ ) values between 300nm and 500nm. The global maximum ( $-9.4 \text{ mA/cm}^2$ ) is achieved at  $(h, \Lambda) = (5000 \text{ nm}, 400 \text{ nm})$ .

Looking at parasitic absorption losses, they show a strong dependence on nanowire height (reduced losses for smaller values of  $h$ ) and a weaker dependence on the cross-section. The global maximum ( $-4.3 \text{ mA/cm}^2$ ) is observed at  $(h, \Lambda) = (500 \text{ nm}, 100 \text{ nm})$ .

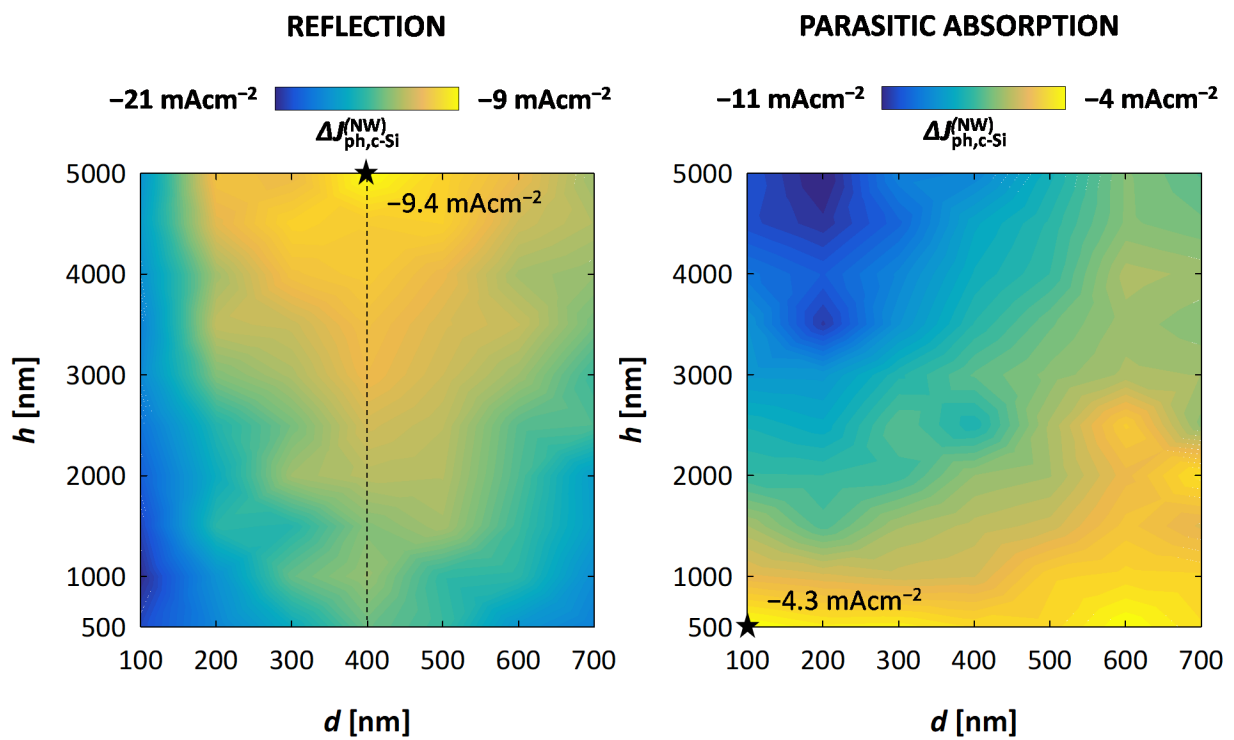

**Figure S2:** Implied photocurrent density losses due to reflection (left) and parasitic absorption (right).
